# Supplementary material
Source: ML conference proceedings conference paper supplement (https://openreview.net/forum?id=qz0MLeaTP1C)
Supplement: supplementary_material [file attachment]

## A Omitted Proofs

**Corollary 9** (Nice Hinge Function – Relative Error Coreset). *Consider the setting of Thm. 8 under the additional assumption that  $a_2 > 0$ . If  $\sum_{i=1}^n p_i = m$  and  $p_i \geq \frac{C \max(\tau_i(X), 1/n) \cdot \mu(X)^2}{\epsilon^2}$  for all  $i$ , where  $C = c \cdot \max(1, L, a_1, 1/a_2)^{10} \cdot \log\left(\frac{\log(n \max(1, L, a_1, 1/a_2) \cdot \mu(X)/\epsilon)m}{\delta}\right)$  and  $c$  is a fixed constant, with probability at least  $1 - \delta$ , for all  $\beta \in \mathbb{R}^d$ ,*

$$\left| \sum_{i=1}^m [Sf(X\beta)]_i - \sum_{i=1}^n f(X\beta)_i \right| \leq \epsilon \cdot \sum_{i=1}^n f(X\beta)_i.$$

*Proof.* By (3) proven in Corollary 6 and using the fact that  $f$  is  $(L, a_1, a_2)$ -nice,

$$\begin{aligned} \sum_{i=1}^n f(X\beta)_i &\geq \sum_{i: [X\beta]_i \in [0, 2a_1]} f(X\beta)_i + \sum_{i: [X\beta]_i \geq 2a_1} f(X\beta)_i \\ &\geq \sum_{i: [X\beta]_i \in [0, 2a_1]} a_2 + \sum_{i: [X\beta]_i \geq 2a_1} \text{ReLU}(X\beta)_i - a_1 \\ &\geq \min\left(\frac{a_2}{2a_1}, \frac{1}{2}\right) \cdot \|(X\beta)^+\|_1 \\ &\geq \min\left(\frac{a_2}{2a_1}, \frac{1}{2}\right) \cdot \frac{\|X\beta\|_1}{\mu(X) + 1}. \end{aligned} \quad (9)$$

Let  $\gamma \stackrel{\text{def}}{=} \min\left(\frac{a_2}{2a_1}, \frac{1}{2}\right)$ . Now we claim that  $\sum_{i=1}^n f(X\beta)_i \geq \frac{na_2\gamma}{4 \max(1, L) \cdot \mu(X)}$ . If  $\sum_{i=1}^n f(X\beta)_i \geq \frac{na_2}{4}$  then this holds immediately since  $\mu(X) \geq 1$ ,  $\max(1, L) \geq 1$  and  $\gamma \leq 1$ . Otherwise, assume that  $\sum_{i=1}^n f(X\beta)_i \leq \frac{na_2}{4}$ . Since  $f(z) \geq a_2$  for all  $z \geq 0$  and since  $f$  is  $L$ -Lipschitz,  $f(z) \geq \frac{a_2}{2}$  for all  $z \geq -\frac{a_2}{2L}$ . This implies that  $X\beta$  has at most  $\frac{na_2/4}{a_2/2} = \frac{n}{2}$  entries  $\geq -\frac{a_2}{2L}$ . Thus,  $X\beta$  has at least  $\frac{n}{2}$  entries  $\leq -\frac{a_2}{2L}$  and so  $\|(X\beta)^-\|_1 \geq \frac{na_2}{4L}$ . Thus, by the definition of  $\mu(X)$  along with (9),

$$\sum_{i=1}^n f(X\beta)_i \geq \gamma \cdot \|(X\beta)^+\|_1 \geq \frac{na_2\gamma}{4L \cdot \mu(X)} \geq \frac{na_2\gamma}{4 \max(1, L) \cdot \mu(X)}. \quad (10)$$

Combining (9) with (10) gives that

$$\sum_{i=1}^n f(X\beta)_i \geq \frac{\gamma \cdot \|X\beta\|_1}{2\mu(X) + 2} + \frac{na_2\gamma}{8 \max(1, L) \cdot \mu(X)} \geq (\|X\beta\|_1 + n) \cdot \frac{\gamma \cdot \min(1, a_2)}{8 \max(1, L) \cdot \mu(X) + 2}.$$

This completes the corollary after applying Thm. 8 with

$$\epsilon' = \epsilon \cdot \frac{\gamma \cdot \min(1, a_2)}{8 \max(1, L) \cdot \mu(X) + 2} \geq \frac{\epsilon}{8 \max(1, L, a_1, 1/a_2)^4 \cdot \mu(X) + 2}.$$

□

## B Lower Bounds for Regularized Classification

We now give a lower bound showing that the results of [CIM<sup>+</sup>19] on coresets for regularized logistic and hinge loss regression (i.e., soft margin SVM) are essentially tight. Our bound tightens a lower bound given in [CIM<sup>+</sup>19]. It shows that, in the natural setting where the regularization parameter is sublinear in the number of data points  $n$ , the coreset size must depend polynomially on  $n$ . This contrasts the setting where we assume that  $\mu(X)$  from Def. 1 is bounded. In this case, as shown in Cor. 9, relative error coresets with size scaling just logarithmically in  $n$  are achievable.

**Theorem 10** (Regularized Classification – Relative Error Lower Bound). *Let  $X \in \mathbb{R}^{n \times d}$  have all row norms bounded by 1. Let  $f$  be the hinge loss  $f(z) = \max(0, 1 + z)$  or log loss  $f(z) = \ln(1 + e^z)$  and for any  $\kappa \in (0, 1)$  consider the regularized loss  $L : \mathbb{R}^d \rightarrow \mathbb{R}^+$ ,*

$$L(\beta) = \sum_{i=1}^n f(X\beta)_i + n^\kappa \cdot R(\beta),$$

where  $\kappa \in (0, 1)$ . There is no  $O(1)$  relative error coreset for  $L(\beta)$  with  $o\left(\frac{n^{1-\kappa}}{\log^c n}\right)$  points where  $c = 4$  for  $R(\beta) = \|\beta\|_2^2$ ,  $c = 5/2$  for  $R(\beta) = \|\beta\|_2$ , and  $c = 3$  for  $R(\beta) = \|\beta\|_1$ .

Note that since this is a lower bound, the assumption that  $X$  has bounded row norms only makes it stronger. This assumption is common in prior work.

*Proof.* We focus on the case when  $f$  is the hinge loss for simplicity. An identical argument applies when  $f$  is the log loss, with some adjustments of the constants. We also focus on the case when  $R(\beta) = \|\beta\|_2^2$ . Again, essentially an identical argument proves the claim when  $R(\beta) = \|\beta\|_2$  or  $R(\beta) = \|\beta\|_1$ . We prove the lower bound via a reduction from the INDEX problem in communication complexity. Alice has a string  $a \in \{0, 1\}^n$  and Bob has an index  $b \in \{1, \dots, n\}$ , and they wish to compute the bit  $a(b)$ . It is well known that the randomized 1-way communication complexity of this problem is  $\Omega(n)$  [Rou15]. We will show that the existence of a relative error coreset for  $L(x)$  with  $o\left(\frac{n^{1-\kappa}}{\log^4 n}\right)$  points would contradict this lower bound, giving the result.

Assume without loss of generality that  $n^{1-\kappa}$  is a power of two. Let  $d = \log_2 n^{1-\kappa}$ . Our reduction is to the INDEX problem with input size  $n_0 = \frac{n^{1-\kappa}}{d(d+1)^2} = \Theta\left(\frac{n^{1-\kappa}}{\log^3 n}\right)$ . Let Alice construct the matrix  $X_0 \in \mathbb{R}^{n_0 \times (d+1)}$  which has the first  $d$  entries of row  $i$  equal to the binary representation of  $i$  if  $a(i) = 1$  and equal to 0 otherwise. In the binary representation, have 0 represented by  $-1$  and 1 represented by 1. Let every row have  $d$  in the last column. Finally, scale the matrix by a  $\gamma = 1/\sqrt{d^2 + d}$  factor so each row has Euclidean norm exactly 1. Let  $X \in \mathbb{R}^{n \times (d+1)}$  be equal to  $n^\kappa \cdot d(d+1)^2$  copies of  $X_0$  stacked on top of each other (assume without loss of generality that  $n^\kappa \cdot d(d+1)^2$  is an integer).

Bob will let  $\beta \in \mathbb{R}^{d+1}$  be the binary representation for  $b$  (again written using  $-1$ s and  $1$ s) with a  $-1$  in the last entry. He will scale  $\beta$  by a  $1/\gamma$  factor so  $\|\beta\|_2^2 = (d+1) \cdot (d^2 + d) = d(d+1)^2$ . If  $a(b) = 1$  we have:

$$\begin{aligned} L(\beta) &= n^\kappa \cdot d(d+1)^2 \cdot \left( \sum_{j \neq b} h(X\beta)_j + h(X\beta)_b \right) + n^\kappa \|\beta\|_2^2 \\ &= n^\kappa \cdot d(d+1)^2 + n^\kappa \cdot d(d+1)^2 = 2n^\kappa \cdot d(d+1)^2, \end{aligned} \quad (11)$$

where the second line holds since for  $j \neq b$ ,  $[X\beta]_j \leq d-1-d \leq -1$  and so  $h(X\beta)_j = 0$ .  $[X\beta]_b = d-d = 0$  and so  $h(X\beta)_b = 1$ . Otherwise, by the same logic, if  $a(b) = 0$  we have:

$$L(\beta) = n^\kappa \cdot d(d+1)^2 \cdot \left( \sum_{j \neq b} h(X\beta)_j + h(X\beta)_b \right) + n^\kappa \|\beta\|_2^2 = n^\kappa \cdot d(d+1)^2. \quad (12)$$

From (11) and (12), we can see that a coreset with relative error  $\epsilon = 1/2$  can distinguish the two cases of  $a(b) = 1$  and  $a(b) = 0$ . Assume that there is such a relative error coreset consisting of  $m$  rows of  $X$ , along with  $m$  corresponding weights  $w_1, \dots, w_m$ . We can assume that all  $w_j \leq n^{c_1}$  for some large constant  $c_1$ . If  $a(i_j) = 1$  any  $w_j$  larger than this would lead to the coreset cost being a large over estimate when  $b = i_j$ . If  $a(i_j) = 0$ , then scaling the  $i_j^{\text{th}}$  row by any  $w_j$  will have no effect since for all  $\beta$  that Bob may generate,  $h(X\beta)_{i_j} = 0$ . So again, we can assume  $w_j \leq n^{c_1}$ .

Additionally, if we round each  $w_j$  to the nearest integer multiple of  $1/n^{c_1}$  we will not change the coreset cost by more than a  $n/n^{c_1}$  factor in all our input cases, since we always have  $h(X\beta)_i \in [0, 1]$ . Thus, Alice can represent each rounded  $w_j$  using  $\log n$  bits and send the full coreset and weights to Bob using  $O(m \cdot (\log n + d)) = O(m \log n)$  bits of communication. Since Bob can then use this coreset to solve the INDEX with input size  $n_0 = \Theta\left(\frac{n^{1-\kappa}}{\log^3 n}\right)$ , we must have  $m = \Omega\left(\frac{n^{1-\kappa}}{\log^4 n}\right)$ , proving the theorem.

In the case that  $R(\beta) = \|\beta\|_2$  we have  $\|\beta\|_2 = d^{1/2}(d+1) = \Theta(d^{3/2})$  and so can set  $n_0 = \Theta\left(\frac{n^{1-\kappa}}{\log^{3/2} n}\right)$  instead of  $n_0 = \Theta\left(\frac{n^{1-\kappa}}{\log^3 n}\right)$ , which gives the final lower bound of  $\Omega\left(\frac{n}{\log^{5/2} n}\right)$ . Similarly, for  $R(\beta) = \|\beta\|_1$ , we have  $\|\beta\|_1 = d^{1/2}(d+1)^{3/2} = \Theta(d^2)$ , yielding a final bound of  $\Omega\left(\frac{n}{\log^3 n}\right)$ .  $\square$

Finally, we compare our lower bound with the the bound in [TBFR21]. We first note that the lower bound in the referenced paper is a lower bound on the sum of sensitivities, rather than directly on the coreset size, as we have given. We are not aware of a general result which lower bounds coreset size via the sum of sensitivities, although perhaps such a result could be shown, at least for reasonable classes of loss functions.

If we set  $\lambda$  in [TBFR21] to  $n^{-\kappa}$ , then we are in the same setting as our lower bound, with regularization  $n^\kappa \|\beta\|$ . In this setting, assuming that  $d < n^{1-\kappa}$ , then the lower bound given in Lemma 1 of [TBFR21] is  $O(n\lambda/d^2) = O(n^{1-\kappa}/d^2)$ . This is loose by a  $d^2$  factor, as compared to our tight lower bound.
